# Supplementary material for: Descriptive Epidemiological Assessment of the Relationship between the Global Burden of Influenza from 2017-2019 and COVID-19
Source: bioRxiv or medRxiv preprint supplement (doi:10.1101/2020.06.18.20134346), 2021-01-19
Supplement: Supplementary file [file 2020.06.18.20134346-1.pdf]

**SUPPLEMENTAL FIGURE 1.** Rank order of top 50 countries by COVID-19 burden from January 1 to May 31 2020 and influenza cases from January 1 2017 to December 31 2019

| World Bank Classification   | Country                  | COVID-19 | 2019 Influenza | 2018 Influenza | 2017 Influenza |
|-----------------------------|--------------------------|----------|----------------|----------------|----------------|
| North America               | United States of America | 1        | 1              | 1              | 1              |
| Latin America & Caribbean   | Brazil                   | 2        | 28             | 14             | 16             |
| Europe & Central Asia       | Russian Federation       | 3        | 7              | 10             | 7              |
| Europe & Central Asia       | United Kingdom           | 4        | 4              | 4              | 4              |
| Europe & Central Asia       | Spain                    | 5        | 8              | 8              | 8              |
| Europe & Central Asia       | Italy                    | 6        | 22             | 19             | 24             |
| South Asia                  | India                    | 7        | 13             | 34             | 25             |
| Europe & Central Asia       | Germany                  | 8        | 47             | 29             | 33             |
| Europe & Central Asia       | Turkey                   | 9        | 43             | 35             | 31             |
| Middle East & North Africa  | Iran                     | 10       | 16             | 37             | 60             |
| Europe & Central Asia       | France                   | 11       | 5              | 6              | 6              |
| Latin America & Caribbean   | Peru                     | 12       | 96             | 46             | 84             |
| Latin America & Caribbean   | Chile                    | 13       | 17             | 21             | 19             |
| North America               | Canada                   | 14       | 3              | 3              | 3              |
| Latin America & Caribbean   | Mexico                   | 15       | 18             | 15             | 15             |
| East Asia & Western Pacific | China                    | 16       | 2              | 2              | 2              |
| Middle East & North Africa  | Saudi Arabia             | 17       | 30             | 42             | 56             |
| South Asia                  | Pakistan                 | 18       | 52             |                |                |
| Europe & Central Asia       | Belgium                  | 19       | 101            | 79             | 79             |
| Middle East & North Africa  | Qatar                    | 20       | 15             | 12             | 13             |
| South Asia                  | Bangladesh               | 21       | 38             | 59             | 38             |
| Europe & Central Asia       | Netherlands              | 22       | 23             | 24             | 21             |
| Europe & Central Asia       | Belarus                  | 23       | 60             | 73             | 52             |
| Latin America & Caribbean   | Ecuador                  | 24       | 64             | 55             |                |
| Europe & Central Asia       | Sweden                   | 25       | 11             | 7              | 9              |
| East Asia & Western Pacific | Singapore                | 26       | 50             | 44             | 42             |
| Middle East & North Africa  | United Arab Emirates     | 27       |                |                |                |

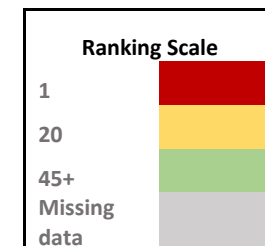

|                             |                    |    |     |     |     |
|-----------------------------|--------------------|----|-----|-----|-----|
| Europe & Central Asia       | Portugal           | 28 | 19  | 22  | 36  |
| Middle East & North Africa  | South Africa       | 29 | 49  | 43  | 37  |
| Europe & Central Asia       | Switzerland        | 30 | 9   | 11  | 12  |
| Latin America & Caribbean   | Colombia           | 31 | 46  | 38  | 49  |
| East Asia & Western Pacific | Indonesia          | 32 | 76  | 58  | 41  |
| Middle East & North Africa  | Kuwait             | 33 | 20  |     |     |
| Europe & Central Asia       | Ireland            | 34 | 25  | 17  | 30  |
| Europe & Central Asia       | Ukraine            | 35 | 61  | 45  | 58  |
| Europe & Central Asia       | Poland             | 36 | 37  | 28  | 32  |
| Middle East & North Africa  | Egypt              | 37 | 31  | 30  | 62  |
| Europe & Central Asia       | Romania            | 38 | 35  | 40  | 66  |
| East Asia & Western Pacific | Philippines        | 39 | 97  | 106 | 81  |
| Middle East & North Africa  | Israel             | 40 | 36  | 36  | 40  |
| Latin America & Caribbean   | Dominican Republic | 41 |     | 108 |     |
| East Asia & Western Pacific | Japan              | 42 | 14  | 13  | 11  |
| Europe & Central Asia       | Austria            | 43 | 26  | 16  | 28  |
| South Asia                  | Afghanistan        | 44 | 102 | 112 | 110 |
| Latin America & Caribbean   | Argentina          | 45 | 21  | 18  | 14  |
| Latin America & Caribbean   | Panama             | 46 | 91  | 110 | 82  |
| Europe & Central Asia       | Denmark            | 47 | 12  | 9   | 17  |
| East Asia & Western Pacific | Republic of Korea  | 48 | 40  | 32  | 34  |
| Europe & Central Asia       | Serbia             | 49 | 33  | 53  | 98  |
| Europe & Central Asia       | Kazakhstan         | 50 | 72  | 71  | 47  |

**SUPPLEMENTAL FIGURE 2.** Rank order of top 15 countries by COVID-19 burden and influenza cases within seven World Bank regions from January 1 to May 31, 2017-2019

| World Bank Classification | Country                          | COVID-19 | Influenza 2019 | Influenza 2018 | Influenza 2017 |
|---------------------------|----------------------------------|----------|----------------|----------------|----------------|
| Sub-Saharan Africa        | South Africa                     | 1        | 1              | 5              | 13             |
|                           | Nigeria                          | 2        | 19             | 17             | 20             |
|                           | Ghana                            | 3        | 9              | 1              | 9              |
|                           | Cameroon                         | 4        | 16             | 12             | 8              |
|                           | Sudan                            | 5        |                |                |                |
|                           | Guinea                           | 6        | 21             | 24             |                |
|                           | Senegal                          | 7        | 3              | 9              | 4              |
|                           | Democratic Republic of the Congo | 8        | 18             | 20             | 17             |
|                           | Cote d'Ivoire                    | 9        | 10             | 6              | 11             |
|                           | Gabon                            | 10       |                |                |                |
|                           | Somalia                          | 11       |                |                |                |
|                           | Kenya                            | 12       | 11             | 10             | 15             |
|                           | Guinea-Bissau                    | 13       |                |                |                |
|                           | Mali                             | 14       | 6              | 11             | 5              |
|                           | Ethiopia                         | 15       | 17             | 8              | 7              |
| East Asia and Pacific     | China                            | 1        | 1              | 1              | 1              |
|                           | Singapore                        | 2        | 8              | 6              | 5              |
|                           | Indonesia                        | 3        | 7              | 5              | 6              |
|                           | Philippines                      | 4        | 15             | 17             | 16             |
|                           | Japan                            | 5        | 2              | 2              | 2              |
|                           | Republic of Korea                | 6        | 4              | 3              | 3              |
|                           | Malaysia                         | 7        | 9              | 9              | 8              |
|                           | Australia                        | 8        | 3              | 4              | 4              |
|                           | Thailand                         | 9        | 6              | 10             | 11             |
|                           | New Zealand                      | 10       | 14             | 18             | 14             |
|                           | Vietnam                          | 11       | 18             | 15             | 10             |
|                           | Myanmar                          | 12       | 20             | 19             | 20             |
|                           | Mongolia                         | 13       | 5              | 8              | 7              |

| Ranking Scale |  |
|---------------|--|
| 1             |  |
| 8             |  |
| 15            |  |
| Missing data  |  |

|                            |                      |    |    |    |    |
|----------------------------|----------------------|----|----|----|----|
|                            | Guam                 | 14 |    |    |    |
|                            | Brunei Darussalam    | 15 |    |    |    |
| South Asia                 | India                | 1  | 1  | 3  | 2  |
|                            | Pakistan             | 2  | 3  |    |    |
|                            | Bangladesh           | 3  | 4  | 8  | 4  |
|                            | Afghanistan          | 4  | 7  | 6  | 8  |
|                            | Maldives             | 5  | 8  | 4  | 3  |
|                            | Sri Lanka            | 6  | 5  | 7  | 1  |
|                            | Nepal                | 7  | 2  | 2  | 6  |
|                            | Bhutan               | 8  | 6  | 5  | 5  |
| Middle East & North Africa | Iran                 | 1  | 2  | 5  | 5  |
|                            | Saudi Arabia         | 2  | 5  | 6  | 6  |
|                            | Qatar                | 3  | 1  | 1  | 1  |
|                            | United Arab Emirates | 4  |    |    |    |
|                            | Kuwait               | 5  | 3  |    |    |
|                            | Egypt                | 6  | 8  | 2  | 4  |
|                            | Israel               | 7  | 4  | 3  | 2  |
|                            | Bahrain              | 8  | 15 | 14 | 11 |
|                            | Oman                 | 9  | 9  | 7  | 3  |
|                            | Algeria              | 10 | 16 | 9  | 10 |
|                            | Morocco              | 11 | 6  | 13 | 7  |
|                            | Iraq                 | 12 |    |    |    |
|                            | Djibouti             | 13 |    |    |    |
|                            | Lebanon              | 14 | 10 | 15 | 9  |
|                            | Tunisia              | 15 | 11 | 8  | 8  |
| Latin America & Caribbean  | Brazil               | 1  | 1  | 1  | 1  |
|                            | Peru                 | 2  | 17 | 6  | 13 |
|                            | Chile                | 3  | 2  | 5  | 4  |
|                            | Mexico               | 4  | 3  | 3  | 3  |
|                            | Ecuador              | 5  | 6  | 3  |    |
|                            | Colombia             | 6  | 4  | 4  | 7  |
|                            | Dominican Republic   | 7  |    | 12 |    |
|                            | Argentina            | 8  | 3  | 13 | 3  |
|                            | Panama               | 9  | 21 | 23 | 16 |

|                       |                          |    |    |    |    |
|-----------------------|--------------------------|----|----|----|----|
|                       | Bolivia                  | 10 | 16 | 2  | 2  |
|                       | Honduras                 | 11 | 22 | 7  | 19 |
|                       | Guatemala                | 12 | 10 | 8  | 9  |
|                       | Puerto Rico              | 13 |    |    |    |
|                       | El Salvador              | 14 | 31 | 29 | 20 |
|                       | Cuba                     | 15 | 11 | 14 | 11 |
| North America         | United States of America | 1  | 1  | 1  | 1  |
|                       | Canada                   | 2  | 2  | 2  | 2  |
|                       | Bermuda                  | 4  |    |    |    |
| Europe & Central Asia | Russian Federation       | 1  | 4  | 7  | 1  |
|                       | United Kingdom           | 2  | 1  | 1  | 3  |
|                       | Spain                    | 3  | 5  | 5  | 6  |
|                       | Italy                    | 4  | 9  | 11 | 12 |
|                       | Germany                  | 5  | 22 | 19 | 16 |
|                       | Turkey                   | 6  | 23 | 20 | 17 |
|                       | France                   | 7  | 2  | 3  | 4  |
|                       | Belgium                  | 8  | 42 | 36 | 31 |
|                       | Netherlands              | 9  | 11 | 14 | 11 |
|                       | Belarus                  | 10 | 26 | 33 | 23 |
|                       | Sweden                   | 11 | 7  | 4  | 5  |
|                       | Portugal                 | 12 | 10 | 12 | 22 |
|                       | Switzerland              | 13 | 6  | 8  | 7  |
|                       | Ireland                  | 14 | 15 | 10 | 18 |
|                       | Ukraine                  | 15 | 27 | 24 | 26 |

**SUPPLEMENTAL FIGURE 3.** Rank order of top 15 countries within seven World Bank regions by COVID-19 cases per capita from January 1 to May 31 2020, and influenza cases per capita from January 1 2017 to December 31 2019

| World Bank Classification | Country                   | COVID-19 | 2019 Influenza | 2018 Influenza | 2017 Influenza |
|---------------------------|---------------------------|----------|----------------|----------------|----------------|
| Sub-Saharan Africa        | Sao Tome and Principe     | 1        |                |                |                |
|                           | Gabon                     | 2        |                |                |                |
|                           | Equatorial Guinea         | 3        |                |                |                |
|                           | Cabo Verde                | 4        | 33             | 31             | 26             |
|                           | Guinea-Bissau             | 5        | 32             | 28             | 27             |
|                           | South Africa              | 6        | 7              | 7              | 5              |
|                           | Guinea                    | 7        | 15             | 16             |                |
|                           | Mauritius                 | 8        | 1              | 1              | 1              |
|                           | Ghana                     | 9        | 4              | 5              | 7              |
|                           | Eswatini                  | 10       |                |                |                |
|                           | Cameroon                  | 11       | 11             | 8              | 6              |
|                           | Senegal                   | 12       | 5              | 4              | 2              |
|                           | Central African Republic  | 13       | 8              | 2              | 4              |
|                           | Somalia                   | 14       |                |                |                |
|                           | Sudan                     | 15       |                |                |                |
| East Asia and Pacific     | Singapore                 | 1        | 5              | 2              | 4              |
|                           | Guam                      | 2        |                |                |                |
|                           | Northern Mariana Islands  | 3        |                |                |                |
|                           | Brunei Darussalam         | 4        |                |                |                |
|                           | Australia                 | 5        | 2              | 3              | 2              |
|                           | Malaysia                  | 6        | 11             | 13             | 11             |
|                           | New Zealand               | 7        | 6              | 6              | 3              |
|                           | Korea, Dem. People's Rep. | 8        | 16             | 12             | 16             |
|                           | French Polynesia          | 9        |                |                |                |
|                           | Philippines               | 10       | 18             | 19             | 20             |
|                           | Japan                     | 11       | 10             | 9              | 8              |
|                           | Indonesia                 | 12       | 20             | 18             | 17             |
|                           | New Caledonia             | 13       | 1              | 1              | 1              |
|                           | China                     | 14       | 8              | 10             | 9              |

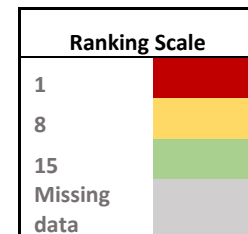

|                           |                            |       |    |    |    |
|---------------------------|----------------------------|-------|----|----|----|
|                           | Mongolia                   | 15    | 3  | 7  | 5  |
| South Asia                | Maldives                   | 1     | 2  | 1  | 1  |
|                           | Afghanistan                | 2     | 7  | 5  | 6  |
|                           | Pakistan                   | 3     | 8  |    |    |
|                           | Bangladesh                 | 4     | 5  | 6  | 5  |
|                           | India                      | 5     | 6  | 8  | 7  |
|                           | Sri Lanka                  | 6     | 4  | 3  | 3  |
|                           | Bhutan                     | 7     | 1  | 2  | 2  |
|                           | Nepal                      | 8     | 3  | 4  | 4  |
|                           | Middle East & North Africa | Qatar | 1  | 1  | 1  |
| Bahrain                   |                            | 2     | 7  | 6  | 6  |
| Kuwait                    |                            | 3     | 3  |    |    |
| United Arab Emirates      |                            | 4     |    |    |    |
| Djibouti                  |                            | 5     |    |    |    |
| Saudi Arabia              |                            | 6     | 9  | 8  | 10 |
| Oman                      |                            | 7     | 4  | 4  | 4  |
| Israel                    |                            | 8     | 5  | 5  | 5  |
| Iran                      |                            | 9     | 8  | 13 | 12 |
| Malta                     |                            | 10    | 2  | 2  | 3  |
| Egypt                     |                            | 11    | 13 | 11 | 14 |
| Algeria                   |                            | 12    | 17 | 15 | 15 |
| Morocco                   |                            | 13    | 12 | 16 | 13 |
| Lebanon                   |                            | 14    | 10 | 12 | 11 |
| Iraq                      |                            | 15    |    |    |    |
| Latin America & Caribbean | Chile                      | 1     | 2  | 2  | 2  |
|                           | Peru                       | 2     | 29 | 23 | 24 |
|                           | Panama                     | 3     | 14 | 14 | 8  |
|                           | Ecuador                    | 4     | 22 | 15 |    |
|                           | Brazil                     | 5     | 28 | 22 | 16 |
|                           | Cayman Islands             | 6     |    |    |    |
|                           | Sint Maarten               | 7     |    |    |    |
|                           | Dominican Republic         | 8     |    | 28 |    |
|                           | Puerto Rico                | 9     |    |    |    |
|                           | Saint Martin               | 10    |    |    |    |

|                       |                              |    |    |    |    |
|-----------------------|------------------------------|----|----|----|----|
|                       | Aruba                        | 11 |    |    |    |
|                       | Bolivia                      | 12 | 21 | 5  | 7  |
|                       | Mexico                       | 13 | 17 | 16 | 10 |
|                       | United States Virgin Islands | 14 |    |    |    |
|                       | Colombia                     | 15 | 26 | 26 | 19 |
| North America         | United States of America     | 1  | 2  | 2  | 2  |
|                       | Canada                       | 2  | 1  | 1  | 1  |
|                       | Bermuda                      | 3  |    |    |    |
| Europe & Central Asia | San Marino                   | 1  |    |    |    |
|                       | Andorra                      | 2  |    |    |    |
|                       | Luxembourg                   | 3  | 15 | 5  | 12 |
|                       | Ireland                      | 4  | 10 | 10 | 10 |
|                       | Iceland                      | 5  | 8  | 6  | 3  |
|                       | Spain                        | 6  | 19 | 15 | 13 |
|                       | Belgium                      | 7  | 43 | 41 | 35 |
|                       | Gibraltar                    | 8  |    |    |    |
|                       | Belarus                      | 9  | 35 | 38 | 23 |
|                       | United Kingdom               | 10 | 13 | 11 | 11 |
|                       | Isle of Man                  | 11 |    |    |    |
|                       | Faroe Islands                | 12 |    |    |    |
|                       | Italy                        | 13 | 30 | 30 | 30 |
|                       | Sweden                       | 14 | 6  | 3  | 6  |
|                       | Switzerland                  | 15 | 5  | 9  | 5  |



**SUPPLEMENTAL TABLE 1.** Categories of missingness for 171 countries reporting influenza cases between January 2017 and December 2019 extracted from FluNet, overall and by region

|                       | All regions |      | Sub-Saharan Africa |      | South Asia |      | North America |      | Middle East & North Africa |      | Latin American & Caribbean |      | Europe & Central Asia |      | East Asia & Pacific |      |
|-----------------------|-------------|------|--------------------|------|------------|------|---------------|------|----------------------------|------|----------------------------|------|-----------------------|------|---------------------|------|
|                       | N=171       |      | N=34               |      | N=8        |      | N=4           |      | N=18                       |      | N=34                       |      | N=49                  |      | N=20                |      |
|                       | n           | %    | n                  | %    | n          | %    | n             | %    | n                          | %    | n                          | %    | n                     | %    | n                   | %    |
| <b>2017</b>           |             |      |                    |      |            |      |               |      |                            |      |                            |      |                       |      |                     |      |
| ≥ 90 Complete         | 95          | 55.6 | 20                 | 58.8 | 5          | 62.5 | 2             | 66.7 | 9                          | 50.0 | 17                         | 50.0 | 25                    | 51.0 | 16                  | 80.0 |
| Missing, seasonal     | 39          | 22.8 | 6                  | 17.6 | 2          | 25.0 | 0             | .    | 3                          | 16.7 | 2                          | 5.9  | 21                    | 42.9 | 3                   | 15.0 |
| Missing, not seasonal | 37          | 21.6 | 8                  | 23.5 | 1          | 12.5 | 1             | 33.3 | 6                          | 33.3 | 15                         | 44.1 | 3                     | 6.1  | 1                   | 5.0  |
|                       | n           | %    | n                  | %    | n          | %    | n             | %    | n                          | %    | n                          | %    | n                     | %    | n                   | %    |
| <b>2018</b>           |             |      |                    |      |            |      |               |      |                            |      |                            |      |                       |      |                     |      |
| ≥ 90 Complete         | 97          | 56.7 | 20                 | 58.8 | 5          | 62.5 | 2             | 66.7 | 8                          | 44.4 | 19                         | 55.9 | 26                    | 53.1 | 16                  | 80.0 |
| Missing, seasonal     | 41          | 24.0 | 6                  | 17.6 | 2          | 25.0 | 0             | .    | 4                          | 22.2 | 3                          | 8.8  | 21                    | 42.9 | 3                   | 15.0 |
| Missing, not seasonal | 33          | 19.3 | 8                  | 23.5 | 1          | 12.5 | 1             | 33.3 | 6                          | 33.3 | 12                         | 35.3 | 2                     | 4.1  | 1                   | 5.0  |
|                       | n           | %    | n                  | %    | n          | %    | n             | %    | n                          | %    | n                          | %    | n                     | %    | n                   | %    |
| <b>2019</b>           |             |      |                    |      |            |      |               |      |                            |      |                            |      |                       |      |                     |      |
| ≥ 90 Complete         | 96          | 56.1 | 20                 | 58.8 | 6          | 75.0 | 2             | 66.7 | 9                          | 50.0 | 18                         | 52.9 | 24                    | 49.0 | 16                  | 80.0 |
| Missing, seasonal     | 41          | 24.0 | 6                  | 17.6 | 2          | 25.0 | 0             | .    | 3                          | 16.7 | 3                          | 8.8  | 22                    | 44.9 | 3                   | 15.0 |
| Missing, not seasonal | 34          | 19.9 | 8                  | 23.5 | 0          | .    | 1             | 33.3 | 6                          | 33.3 | 13                         | 38.2 | 3                     | 6.1  | 1                   | 5.0  |
